# 1 **Genomic drivers of large B-cell lymphoma resistance to CD19 CAR-T** 2 **therapy**

3

4 Michael D. Jain<sup>1,7</sup>, Bachisio Ziccheddu<sup>2,3,7</sup>, Caroline A. Coughlin<sup>4,5,7</sup>, Rawan Faramand<sup>1</sup>,  
5 Anthony J. Griswold<sup>6</sup>, Kayla M Reid<sup>1</sup>, Ola Landgren<sup>2,3</sup>, Frederick L. Locke<sup>1,7</sup>, Francesco  
6 Maura<sup>2,3,7</sup>, Marco L. Davila<sup>1,7</sup>, and Jonathan H. Schatz<sup>2,3,7</sup>

7

8 <sup>1</sup>Blood and Marrow Transplant and Cellular Immunotherapy, H. Lee Moffitt Cancer  
9 Center and Research Institute, University of South Florida Morsani College of Medicine,  
10 Tampa, FL, USA. <sup>2</sup>Division of Hematology, Department of Medicine, University of Miami  
11 Miller School of Medicine, Miami, FL, USA. <sup>3</sup>Sylvester Comprehensive Cancer Center,  
12 University of Miami Miller School of Medicine, Miami, FL, USA. <sup>4</sup>Medical Scientist  
13 Training Program, University of Miami Miller School of Medicine, Miami, FL, USA.  
14 <sup>5</sup>Sheila and David Fuente Graduate Program in Cancer Biology, University of Miami  
15 Miller School of Medicine, Miami, FL, USA. <sup>6</sup>John P. Hussman Institute for Human  
16 Genomics, University of Miami Miller School of Medicine, Miami, FL, USA. <sup>7</sup>These  
17 authors contributed equally: Michael D. Jain, Bachisio Ziccheddu, Caroline A. Coughlin,  
18 Frederick L. Locke, Francesco Maura, Marco L. Davila, Jonathan H. Schatz.

19

## 20 **Corresponding Authors:**

21 Francesco Maura, MD  
22 Myeloma Program, Sylvester Comprehensive Cancer Center, University of Miami,  
23 1120 NW 14th Street, Clinical Research Building  
24 Miami, FL 33136  
25 Phone (305) 243-7687  
26 E-mail: [fxm557@med.miami.edu](mailto:fxm557@med.miami.edu)

27

28 Frederick L. Locke, MD  
29 Division of Clinical Science, Department of Blood & Marrow Transplant and Cellular  
30 Immunotherapy  
31 H. Lee Moffitt Cancer Center  
32 12902 Magnolia Dr  
33 Tampa, FL 33612  
34 Phone (813) 745-1006  
35 E-mail: [Frederick.Locke@moffitt.org](mailto:Frederick.Locke@moffitt.org)

36

37 Marco L. Davila, MD, PhD  
38 Division of Clinical Science, Department of Blood & Marrow Transplant and Cellular  
39 Immunotherapy  
40 H. Lee Moffitt Cancer Center  
41 12902 Magnolia Dr  
42 Tampa, FL 33612  
43 Phone (813) 745-1006

44 E-mail: [marco.davila@moffitt.org](mailto:marco.davila@moffitt.org)

45

46 Jonathan H. Schatz, MD

47 Division of Hematology, Department of Medicine, University of Miami

48 1580 NW 10th Avenue

49 Batchelor Building, Room # 419, Locator # M877

50 Miami, FL 33136-1000

51 Phone (305) 243-7742

52 E-mail: [jschatz@med.miami.edu](mailto:jschatz@med.miami.edu)

53

54 **ABSTRACT**

55 Chimeric antigen receptor-reprogrammed autologous T cells directed to CD19 are breakthrough  
56 immunotherapies for heavily pretreated patients with aggressive B-cell lymphomas but still fail to  
57 cure most patients. Host inflammatory and tumor microenvironmental factors associate with CAR-  
58 19 resistance, but the tumor-intrinsic factors underlying these phenomena remain undefined. To  
59 characterize genomic drivers of resistance, we interrogated whole genome sequencing of 30  
60 tumor samples from 28 uniformly CAR-19-treated large-cell lymphoma patients. We reveal that  
61 patterns of genomic complexity (i.e., chromothripsis and APOBEC mutational activity), and  
62 distinct genomic alterations (deletions of *RB1* or *RHOA*) associate with more exhausted immune  
63 microenvironments and poor outcome after CAR-19 therapy. Strikingly, pretreatment reduced  
64 expression or sub-clonal mutation of CD19 did not affect responses, suggesting CAR-19 therapy  
65 successes are due not only to direct antigen-dependent cytotoxicity but require surmounting  
66 immune exhaustion in tumor microenvironments to permit broader host responses that eliminate  
67 tumors.

68

## 69 INTRODUCTION

70 Chimeric antigen receptor-modified T cells targeting CD19 (CAR-19) are among new  
71 immunotherapy options for patients with diffuse large B-cell lymphoma (DLBCL)<sup>1-3</sup>. Unfortunately,  
72 treatment failures and relapses are common<sup>4-9</sup>, and underlying mechanisms remain unclear.  
73 Disease aggressiveness and serum inflammatory markers associate with poor outcome<sup>5,10,11</sup>, as  
74 does T-cell exhaustion in either the tumor microenvironment (TME)<sup>12</sup> or the CAR-19 product<sup>13</sup>.  
75 Efforts to improve efficacy such as dual-targeting strategies<sup>14-16</sup> remain uninformed by an  
76 understanding of the lymphoma cell-intrinsic factors that drive CAR-19 failures. In particular, there  
77 is a lack of knowledge on tumor cell genomic drivers involved in relapse.

78 We therefore were motivated to dissect the role of genomic drivers and their association  
79 with the TME changes that thwart CAR-19 efficacy. We performed the first ever whole-genome  
80 sequencing (WGS) analysis of large B-cell lymphoma tumors from patients uniformly treated with  
81 the CAR-19 product axicabtagene ciloleucel (axi-cel). We find resistance associated with specific  
82 genomic findings including chromothripsis events, apolipoprotein B mRNA-editing enzyme,  
83 catalytic polypeptide (APOBEC) mutational activity, point mutations in distinct driver, and  
84 deletions of *RB1* or *RHOA*. *CD19* genomic loss and/or low expression by flow cytometry were  
85 mostly confined to patients with complete responses and excellent outcome, and all samples  
86 collected at relapse expressed CD19. These data suggest CAR-19 clinical activity is driven not  
87 only by the interaction between the engineered immune effector and CD19 but also by promoting  
88 a broader immune attack that is more likely to be thwarted by genome complexity and tumor  
89 aggressiveness than by loss of the CAR-targeted antigen.

90

## 91 RESULTS

### 92 Patient cohort

93 LBCL tumor biopsies (with paired germline samples) of 31 patients treated with axi-cel  
94 were analyzed by WGS (median coverage 44.3X, range 30.39-76.08, **Supplementary Table 1**).  
95 Of the initial 31 cases, three failed sequencing due to low cancer cell fraction (CCF) and normal  
96 match contamination. Most tumors were sampled immediately prior to CAR-19 therapy, with two  
97 cases containing relapse-only biopsies and two with both pre-CAR-19 and relapse samples.  
98 Demographics, disease characteristics and response to axi-cel treatment for the 28 patients with  
99 reportable data are summarized in **Table 1**. All had large B-cell lymphoma – 24 with DLBCL, 3  
100 with transformed follicular lymphoma (tFL), and 1 with primary mediastinal B-cell lymphoma

**TABLE 1: Patient Information**

| <b>Characteristic</b>                                                        | <b>All Patients<br/>(n = 28)</b> |
|------------------------------------------------------------------------------|----------------------------------|
| <b>Age, years</b>                                                            |                                  |
| Median                                                                       | 66                               |
| Range                                                                        | 19 - 76                          |
| <b>Sex, n (%)</b>                                                            |                                  |
| Female                                                                       | 8 (28.6%)                        |
| Male                                                                         | 20 (71.4%)                       |
| <b>Disease, n (%)</b>                                                        |                                  |
| DLBCL                                                                        | 24 (85.7%)                       |
| TFL                                                                          | 3 (10.7%)                        |
| PMBCL                                                                        | 1 (3.6%)                         |
| <b>Stage at apheresis, n (%)</b>                                             |                                  |
| I/II                                                                         | 5 (17.9%)                        |
| III/IV                                                                       | 23 (82.1%)                       |
| <b>IPI at apheresis, n (%)</b>                                               |                                  |
| 1-2                                                                          | 7 (25.0%)                        |
| 3-5                                                                          | 21 (75.0%)                       |
| <b>ECOG at apheresis, n (%)</b>                                              |                                  |
| 0-2                                                                          | 21 (75.0%)                       |
| 3-4                                                                          | 7 (25.0%)                        |
| <b>Prior treatment regimens, n</b>                                           |                                  |
| Median                                                                       | 3                                |
| Range                                                                        | 1-6                              |
| <b>Salvage Chemotherapies</b>                                                |                                  |
| Platinum compounds                                                           | 21 (75.0%)                       |
| Cisplatin                                                                    | 5 (17.9%)                        |
| Carboplatin                                                                  | 11 (39.3%)                       |
| Oxaliplatin                                                                  | 5 (17.9%)                        |
| Melphalan                                                                    | 5 (17.9%)                        |
| <b>Previous HDT/ASCR, n (%)</b>                                              | 5 (17.9%)                        |
| <b>Bridging therapy, n (%)</b>                                               |                                  |
| No                                                                           | 8 (28.6%)                        |
| Yes                                                                          | 19 (67.9%)                       |
| N/A                                                                          | 1 (3.6%)                         |
| <b>Cytokine release syndrome (CRS), n (%)</b>                                |                                  |
| Grade 0                                                                      | 4 (14.3%)                        |
| Grade 1-2                                                                    | 20 (71.4%)                       |
| Grade 3-4                                                                    | 4 (14.3%)                        |
| <b>Immune effector cell-associated neurotoxicity syndrome (ICANS), n (%)</b> |                                  |
| Grade 0                                                                      | 7 (25.0%)                        |
| Grade 1-2                                                                    | 11 (39.3%)                       |
| Grade 3-4                                                                    | 9 (32.1%)                        |
| <b>Durable Response, n (%)</b>                                               |                                  |
| CR (complete response)                                                       | 10 (35.7%)                       |
| PR (partial response)                                                        | 1 (3.6%)                         |
| SD (stable disease)                                                          | 0 (0%)                           |
| PD (progressive disease)                                                     | 16 (57.1%)                       |
| Unable to assess                                                             | 1 (3.6%)                         |

**Abbreviations:** DLBCL (diffuse large B cell lymphoma), TFL (transformed follicular lymphoma), PMBCL (primary mediastinal B cell lymphoma), IPI (international prognostic index), ECOG (Eastern cooperative oncology group), HDT/ASCR (high-dose therapy with autologous stem-cell rescue).

101 (PMBCL). Median age was 66 (range: 19-76), and 8 (29%) were female. The median number of  
102 prior treatments was 3 (range: 1-6), with 21 (75%) patients exposed to platinum-containing  
103 regimens and 5 patients (18%) had undergone high dose melphalan-based conditioning and  
104 autologous stem-cell rescue (HDT/ASCR). Nineteen patients (67.9%) received bridging therapy  
105 between apheresis and CAR-19 infusion. After treatment, 4 patients (14.3%) experienced grade  
106 3 or higher cytokine release syndrome (CRS) and 9 patients (32.1%) had grade 3 or higher  
107 immune effector cell-associated neurotoxicity syndrome (ICANS). One patient passed away  
108 within a week post-infusion due to CAR-19 toxicity and with unknown disease response. This  
109 patient was omitted from progression free survival (PFS) but included in overall survival (OS)  
110 analyses. Median OS for the cohort as a whole was 11.6 months, with PFS 8.0 months  
111 (**Supplementary Figure 1a-b**). Durable responses were seen in 11 (39%), of which 10 were  
112 complete responses (CR) and one a durable partial response (PR) (**Table 1**). Overall, these  
113 results are comparable to previously reported axi-cel outcomes<sup>4,9</sup>.

114

#### 115 **Mutations in driver genes associated with CAR-19 outcome in r/r LBCL.**

116 We first examined markers associated with prognosis in previously untreated DLBCL,  
117 which in other series have not associated with CAR-19 outcome<sup>5</sup>. Double hit (DH), defined as  
118 cases with a chromosomal rearrangement in *MYC* together with rearrangement(s) in *BCL2* and/or  
119 *BCL6*, did not correlate with outcome (**Supplementary Figure 1c**). Nor did double-expression  
120 (DE) of *MYC* and *BCL2* proteins by immunohistochemistry (IHC, **Supplementary Figure 1d**)<sup>17-</sup>  
121 <sup>20</sup>. In line with recent evidence<sup>21,22</sup>, high metabolic tumor volume (MTV) associated with inferior  
122 outcome in our cohort ( $p=0.019$ , **Supplementary Figure 1e**). Using the WGS data, we assigned  
123 all patients (28/28) to one of the genomic clusters described by Chapuy et al., predictive of  
124 outcome in newly diagnosed DLBCL<sup>23</sup>. Most cases fell into Cluster #2 or Cluster #3, which are  
125 characterized by *BCL2* alterations and mutations in chromatin modifiers like *KMT2D* and  
126 *CREBBP* (Cluster #2) or inactivation of *TP53* and recurrent chromosome-segment amplifications  
127 and deletions (Cluster #3). No patients fell into the more favorable Cluster #4, and only 2 were in  
128 Cluster #1, which also has a more favorable outcome, likely reflecting improved responses to  
129 prior treatments in these patients. Only one patient fell into Cluster #5, a subgroup with notoriously  
130 worse outcome, suggesting highly aggressive disease phenotype at relapse limits opportunities  
131 for CAR-19 referral (**Supplementary Figure 1f**). Notably, this Cluster #5 patient unfortunately  
132 rapidly progressed and passed away a few weeks after treatment. We also used the publicly  
133 available LymphGen classification algorithm<sup>24</sup> and the majority of classified cases fell into the EZB

134 cluster, characterized by epigenetic dysregulation and corresponding roughly to Cluster #3 in  
135 Chapuy (**Supplementary Figure 1g**)<sup>24</sup>. Neither system showed prognostic significance to CAR-  
136 19. In line with other reports, we found no established markers of prognosis in newly diagnosed  
137 DLBCL correlated with response to CAR-19, and we therefore initiated WGS-based unbiased  
138 definition of the key genomic resistance drivers.

139 Including the two cases with both pre- and post-CAR-19 samples, 30 total tumor samples  
140 successfully underwent WGS from the 28 r/r patients, together with matched germline for all  
141 individuals. We found a median of 12801.5 somatic variants per sample (range: 5382-28033  
142 somatic variants) (**Supplementary Figure 2a**). Patients who progressed on CAR-19 had an  
143 increased number of variants compared to those who achieved a prolonged remission ( $p=0.034$ ,  
144 **Supplementary Figure 2b**); however, there was no difference in total nonsynonymous mutational  
145 burden between patients who progressed on CAR-19 versus patients with durable responses. To  
146 identify driver genes, we leveraged the ratio of nonsynonymous to synonymous mutations using  
147 the dNdScv algorithm<sup>25</sup>. To increase statistical power, we combined our r/r cohort with 50 newly  
148 diagnosed DLBCL cases from the Pan-Cancer Analysis of Whole Genomes (PCAWG)<sup>26</sup>. Positive  
149 selection was detected in 36 candidate driver genes ( $q$  value  $< 0.1$ ; **Supplementary Table 2**)<sup>25</sup>.  
150 After correction for multiple testing using false discovery rate (fdr), we found that only *TP53* was  
151 significantly enriched in our cohort (fdr=0.069) in comparison with the PCAWG cohort. It was also  
152 the most frequently mutated gene with 50% of r/r cases containing at least one mutation  
153 (**Supplemental Figure 2c**). Nevertheless, *TP53* did not predict poor CAR-19 outcome. These  
154 findings are consistent with what has been previously reported in r/r cases<sup>27</sup>. Among these  
155 positively selected driver genes and genes known to be involved in DLBCL pathogenesis  
156 (**Supplementary Figure 2c**), only NF-kappa-B-inhibitor-alpha (*NFKBIA*) and *MYC* mutations  
157 were associated with worse PFS after CAR-19 ( $p=0.04$ ,  $p=0.025$  respectively, **Supplementary**  
158 **Figure 2d-e**).

159

## 160 **Mutational signatures' impact on CAR-19 efficacy.**

161 Next, we ran *sigProfiler*<sup>28</sup> and hierarchical Dirichlet<sup>29</sup> to investigate underlying mutational  
162 processes (i.e., mutational signatures) involved in shaping the repertoire of single base  
163 substitutions (SBS). To increase resolution and statistical power we combined our r/r cohort with  
164 50 WGS from patients with newly diagnosed DLBCL included in PCAWG<sup>26</sup>. Combining these two  
165 de novo mutational signatures approaches, we identified 12 mutational signatures involved in our  
166 cohort of r/r lymphomas. Eight of these are currently included in the COSMIC catalog v.2



167 (<https://cancer.sanger.ac.uk/signatures/sbs>) and have previously been reported in newly  
168 diagnosed DLBCL: SBS1 (aging), SBS2 (APOBEC), SBS5 (aging), SBS8, SBS9 (poly eta -  
169 germinal center), SBS13 (APOBEC), SBS17b and SBS18 (reactive oxygen species)<sup>28</sup>. All of the  
170 other four extracted mutational signatures are caused by exposure to distinct chemotherapies  
171 and 2 are not yet included in the COSMIC catalog (SBS-MM1 = melphalan; E\_SBS37 =  
172 oxaliplatin, SBS31 = cisplatin/carboplatin, SBS35 = cisplatin signatures; **Figure 1a**)<sup>28-33</sup>. Next, to  
173 confirm the presence of each mutational signature and to accurately estimate its contribution, we  
174 ran the *mmsig* fitting algorithm<sup>34</sup>. As expected SBS-MM1 was identified in 4 out of 5 patients who  
175 received melphalan as part of HDT/ASCR (**Figure 1b**). To accurately define evidence of platinum  
176 mutagenic activity, we implemented the double base substitution analysis (DBS) and detected  
177 DBS5 (platinum chemotherapy treatment signature) in 83% (15/18) of patients who had evidence  
178 of platinum SBS-signatures (**Figure 1b**). Interestingly 6 out of 24 (25%) previously exposed to  
179 platinum did not show any sign of these chemotherapy related SBS and DBS signatures. It has  
180 been shown that distinct chemotherapy agents promote their mutagenic activity introducing a  
181 unique catalogue of mutations in each exposed single cell<sup>29,32,33,35</sup>. Therefore, this single-cell  
182 chemotherapy-barcode will be detectable by bulk WGS only if one single tumor cell exposed to  
183 the chemotherapy expands, taking clonal dominance (i.e., single-cell expansion model). In  
184 contrast, chemotherapy-induced mutational signatures will not be detectable if the cancer  
185 progression is driven by multiple clones originating from different single cells exposed to  
186 chemotherapy and therefore harboring different chemotherapy-barcodes (catalogue of unique  
187 chemotherapy-related mutations). The concept of chemotherapy-barcoding can also be used to  
188 time events and to establish if the progression was driven by one or more single tumor cells<sup>33</sup>. To  
189 do so, we reconstructed the phylogeny of two cases with samples collected before and at relapse  
190 after CAR-19 therapy (**Methods**). In one patient (CAR\_84), the clonal composition did not change  
191 over time and no platinum-related signatures were detected despite prior exposure, suggesting a  
192 complete refractoriness to CAR-T where the progression is driven by multiple tumor cells/clones.  
193 The other case (CAR\_39) is an example of branching evolution after CAR-19, with each branch  
194 characterized by a unique SBS-MM1 catalogue of mutations (**Figure 1c**). This scenario is  
195 compatible with progression driven by a single cell previously exposed to melphalan (SBS-MM1)  
196 and platinum (SBS31) that took clonal dominance to drive relapse after initial complete remission  
197 in response to CAR-T infusion. Overall, these data revealed that, similar to other cancers<sup>33,35</sup>,  
198 aggressive lymphomas can increase mutational burden at relapse due to exposure to mutagenic  
199 agents, and progression can be driven by single surviving cells.



**Fig.1 Relapsed or refractory large B-cell lymphoma mutational signatures landscape. a)** The 4 chemotherapy-related signatures detected in our 28 r/r LBCL patients treated with CAR-T cell therapy. **b)** The relative contribution of each mutational signature (color) per each sample (x-axis). Asterisks indicate the presence of DBS5 (Platinum chemotherapy treatment double base substitution signature). **c)** Mutational-signature contributions for each phylogenetic tree cluster (sample CAR\_39). Mutational signature colors are the same as the figure b legend. Asterisk indicates the present of DBS5. **d)** The Kaplan-Meier plot of progression free survival (PFS) comparing patients with (APOBEC +; in blue) and without APOBEC signature (APOBEC -; in red).

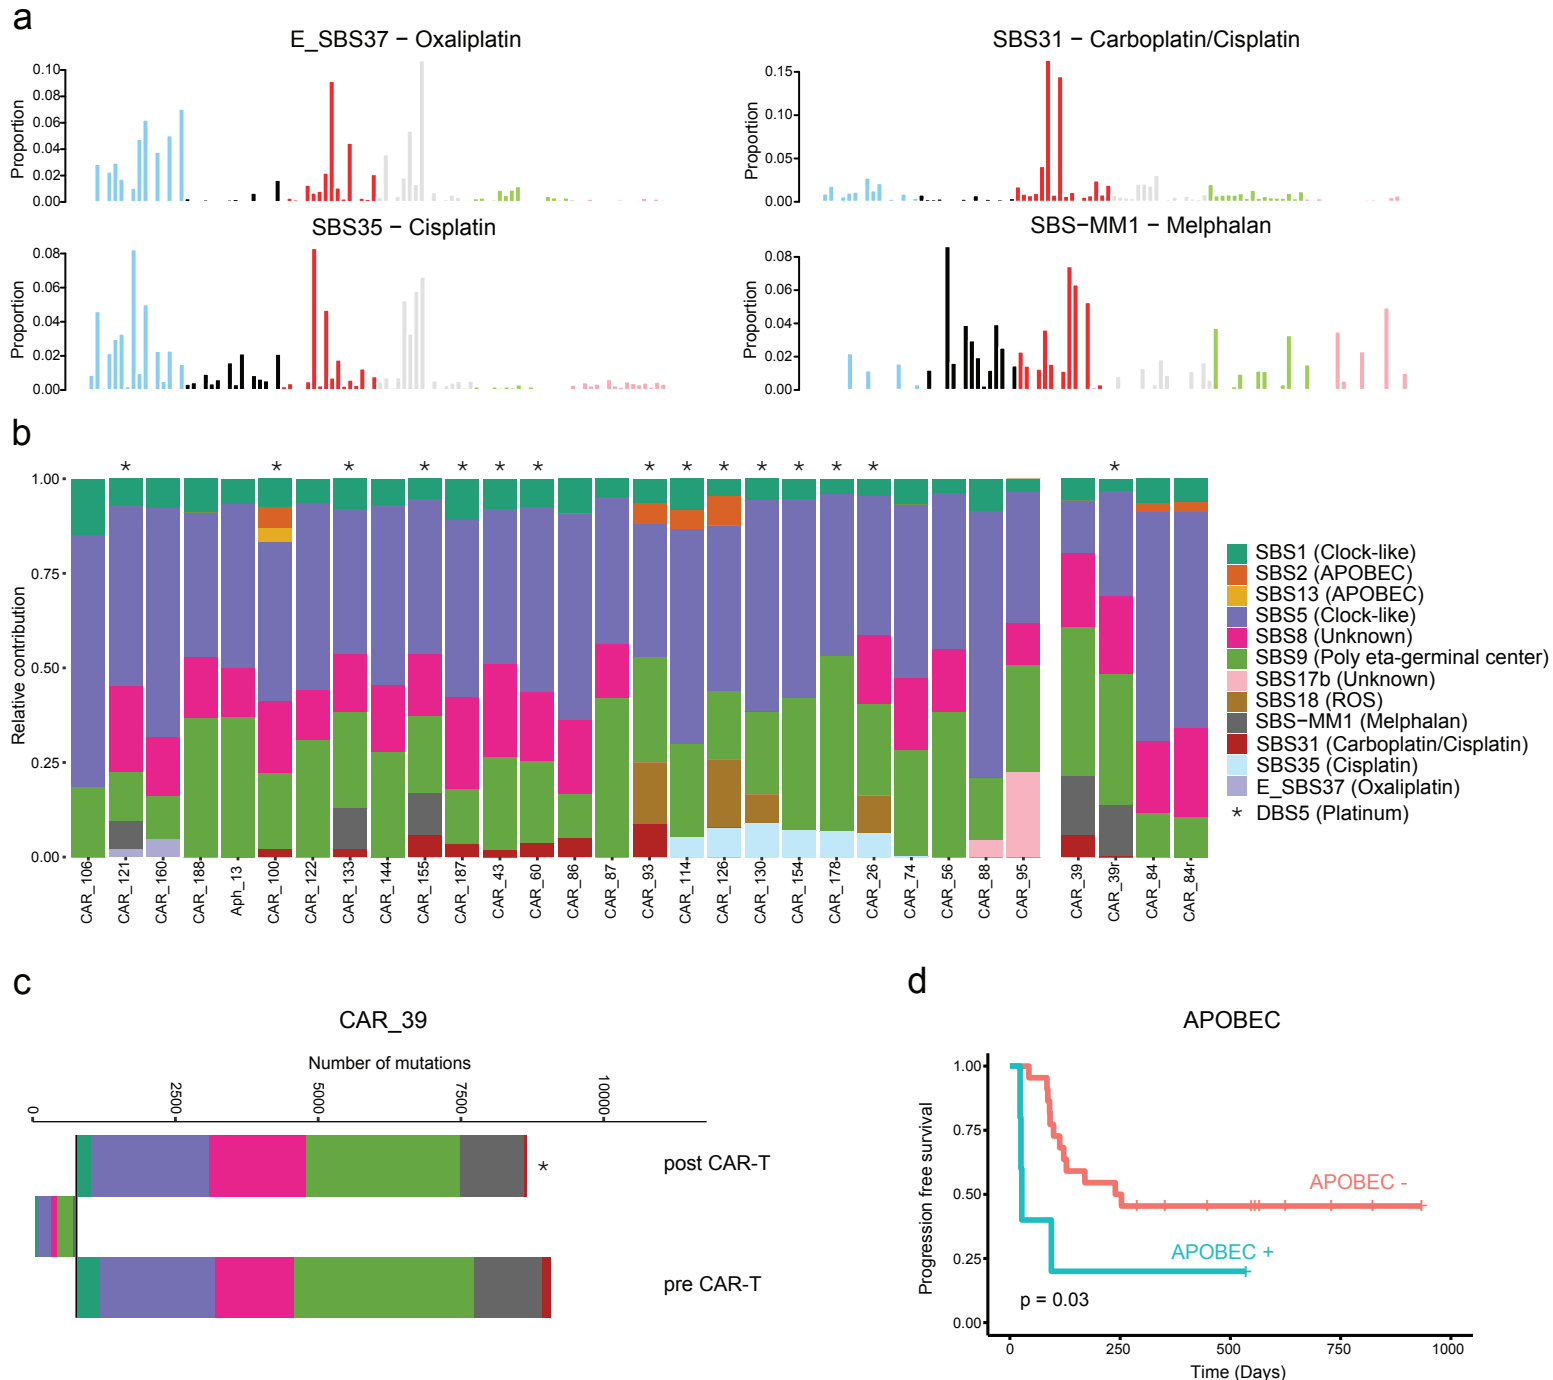

200 When correlated to response to CAR-T therapy, SBS2 and SBS13 (APOBEC) carried a  
201 significantly worse PFS with 4/5 patients progressing within four months ( $p=0.03$ ; **Figure 1d**).  
202 APOBEC refers to a family of cytidine deaminases that generates an innate immune response to  
203 viruses and which has been shown to be active in many human cancers<sup>28,29,36</sup>, in particular in  
204 refractory tumors<sup>37</sup>, in metastasis<sup>38,39</sup>, and in tumors with loss of *HLA*<sup>40</sup>. Specific to lymphoma,  
205 APOBEC3 family members have been shown to contribute to lymphomagenesis in primary  
206 effusion lymphoma, and its mutagenic activity can be detected in 7.8% of newly diagnosed  
207 DLBCL<sup>28,41</sup>. APOBEC signatures in LBCL tumors may therefore be a biomarker of poor response  
208 to CAR-19.

209

### 210 **Focal deletions of *RB1* or *RHOA* and poor CAR-19 responses.**

211 We ran the *GISTIC* v2.0 algorithm<sup>42</sup> to compare the genome-wide CNV distribution  
212 between our 28 r/r patients and 50 newly diagnosed DLBCL in PCAWG<sup>26</sup> (see **Methods**). We  
213 detected 8 arm-level and 8 focal regions of copy number gain and 3 arm-level and 19 focal regions  
214 of copy number loss ( $q$  value  $< 0.1$ ; **Figure 2a** and **Supplementary Figure 3a**). Comparing the  
215 prevalence of these significant CNVs between r/r and *de novo* DLBCL three deletions emerged  
216 as statistically significant and enriched in the first group: chr17p13.1 (*TP53*;  $p=0.038$ ), chr3p21.31  
217 (*RHOA*;  $p=0.05$ ), and chr13q14.2 (*RB1*;  $p=0.038$ ; **Figure 2b**). Despite the high prevalence of  
218 *TP53* deletions in our r/r cohort (46.4%), this lesion did not carry prognostic impact in patients  
219 after CAR-19 (**Figure 2c**). Combining *TP53* with the related tumor suppressor *CDKN2A*, 78.6%  
220 of our samples had at least one mutated or deleted allele in one of the two genes (**Supplementary**  
221 **Figure 3b**), reflecting the aggressive nature of the tumors included in our cohort which had  
222 relapsed after multiple courses of intensive chemotherapy. Interestingly, deletions involving  
223 *RHOA* and *RB1* were strongly predictive of poor outcome after CAR-19 ( $p=0.0007$  and  $p=0.05$   
224 respectively; **Figure 2c**) with 5/5 (100%) and 6/8 (75%) patients respectively whose tumors  
225 harbored these deletions progressing. This analysis highlights two novel driver genes in CAR-19  
226 response in r/r LBCL and further confirms CAR-19 outcomes are affected by genomic features  
227 different from those associated with poor prognosis in newly diagnosed DLBCL.

**Fig.2 Clinical impact of recurrent copy number anomalies in r/r LBCL.** **a)** The heatmap shows the significant genes extracted by GISTIC combining r/r LBCL and newly diagnosed PCAWG samples. The unsupervised hierarchical clustering was performed using Euclidean distance and Ward's linkage. Bi-allelic inactivation is defined as the presence of two deletions or one deletion and one mutation in the same patients. **b)** Stacked bars show the significant GISTIC peaks enriched in our r/r LBCL compare to PCAWG. The y-axis specifies proportions for each sample. The p value was obtained with one-tailed Fisher's exact test. **c)** Kaplan-Meier plots showing the impact of TP53, RHOA and RB1 deletion on progression free survival after CAR-19 of progression free survival.

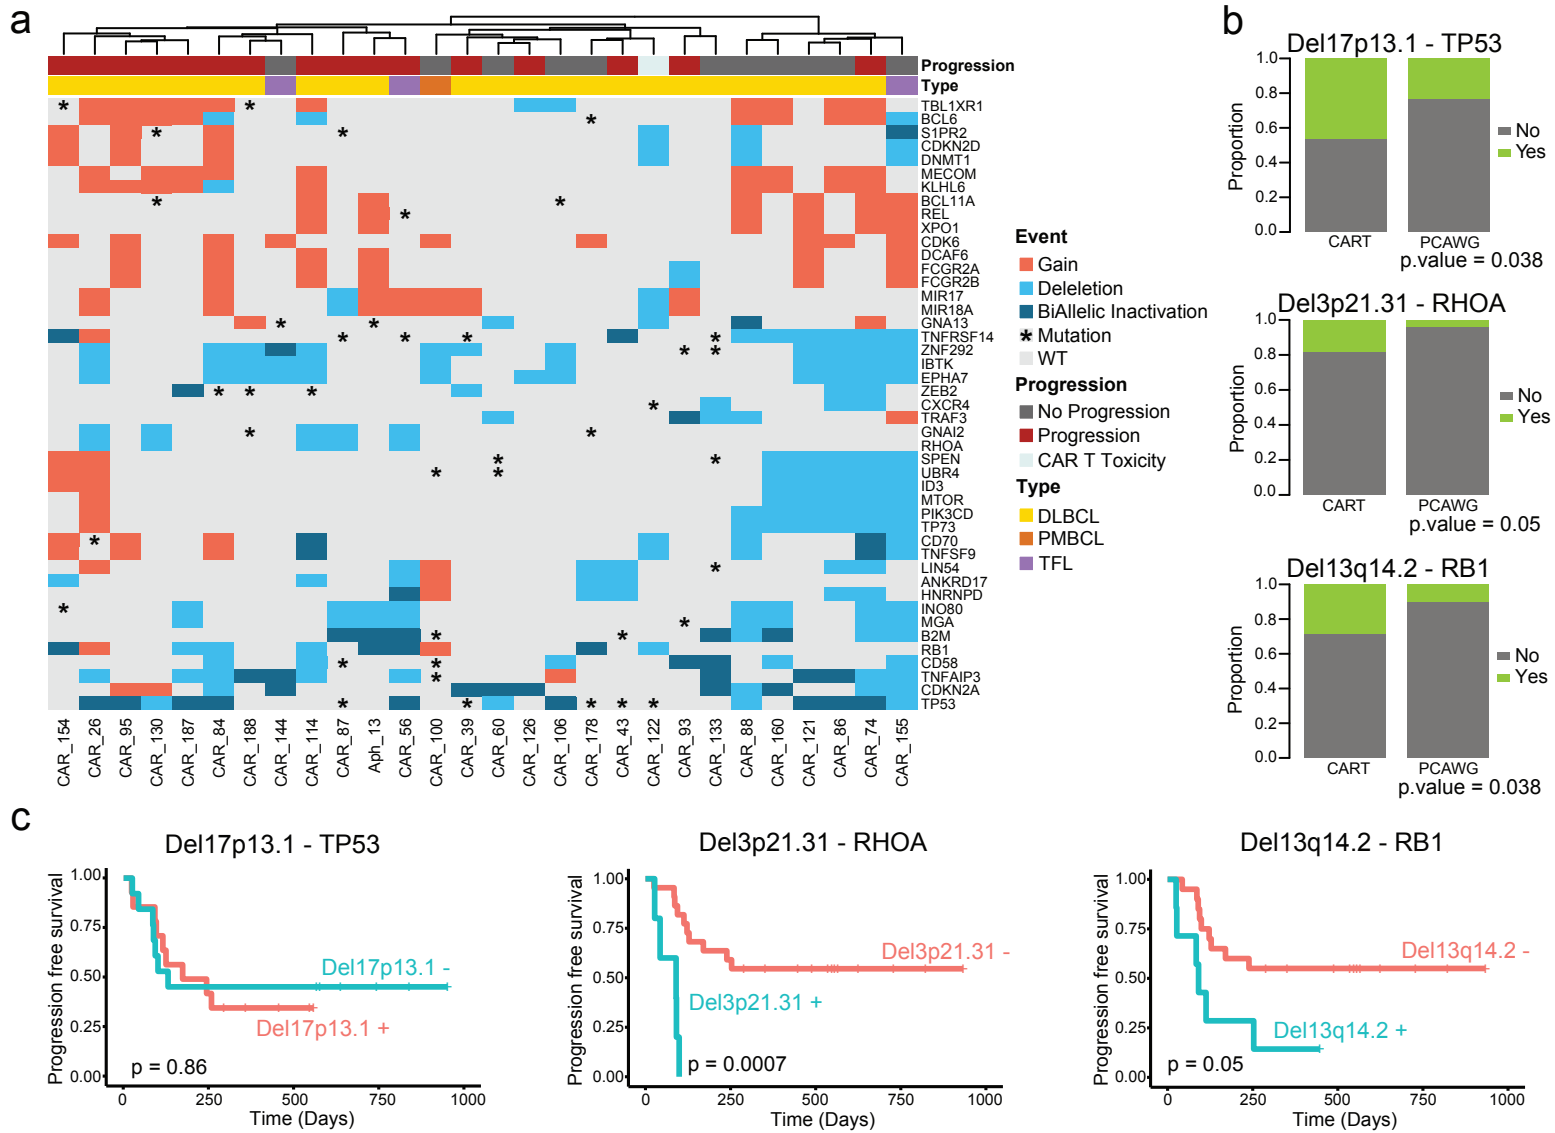

228 **Chromothripsis events mark cases doomed to fail CAR-19 treatment.**

229 WGS allows detailed identification of structural variants (SVs) and complex events. We  
230 identified a total of 1669 SVs across the 30 WGS samples (median 42.5 per r/r patients, range 9-  
231 156; **Figure 3a**). Similar to other hematologic malignancies<sup>43-46</sup>, we observed evidence of three  
232 main complex SV events: chromothripsis, chromoplexy, and templated insertion. Chromoplexy is  
233 defined as a concatenation of structural variants leading to multiple simultaneous chromosomal  
234 losses. Templated insertions represent a concatenation of interchromosomal structural variants  
235 leading to a derivative chromosome where multiple focal gains involving oncogenes and  
236 regulatory regions are strung together and reinserted in the genome<sup>43,45</sup>. Chromoplexy and  
237 templated insertions were observed in 32.1% and 25% of patients respectively, and only  
238 templated insertions were enriched in the cohort compared to PCAWG ( $p = 0.029$ ).  
239 Chromothripsis represents a catastrophic event in which one or more than one chromosome is  
240 shattered and aberrantly reassembled generating multiple aneuploidies (**Figure 3b**)<sup>43,47</sup>. This  
241 event was identified in 39.3% of r/r cases, slightly higher than in newly diagnosed DLBCL (24%,  
242 **Figure 3a**) though not significantly enriched. Interestingly, across all different SV and complex  
243 events, only chromothripsis had a significant impact toward worse PFS ( $p=0.041$ , **Figure 3c**) after  
244 CAR-19 treatment, with 9/11 (81%) cases experiencing early progression. Chromothripsis has  
245 often been associated with presence of APOBEC in other cancers<sup>44,45,47</sup>, therefore we  
246 investigated the relationship between these two genomic features across our cohort and their  
247 impact on outcome post CAR-19. Interestingly, only 1/5 (20%) cases with APOBEC had evidence  
248 of chromothripsis, suggesting an absence of a strong relationship between these two features.  
249 Notably, patients with either APOBEC or chromothripsis were characterized by a particularly  
250 unfavorable PFS ( $p=0.0057$ , **Figure 3d**).

**Fig.3 The landscape of structural variants in r/r LBCL and outcome association. a)** Stacked bars show the genome-wide burden of each SV class and complex event per each sample (x-axis), grouped by analysis cohort. **b)** Left side, copy number profile plot integrated with SV information showing an emblematic example of chromothripsis on chromosome 9 responsible of CDKN2A loss (sample CAR\_39). The horizontal black line indicates the total copy number; the dashed orange line indicates the minor copy number. The vertical lines represent SV breakpoints, color-coded based on SV class. Red text represents the DLBCL driver genes present on chromosome 9. Right side, the circo plot showing the genome wide distribution of the same chromothripsis event. **c)** Kaplan-Meier plot for progression free survival comparing patients with and without chromothripsis. **d)** Kaplan-Meier plot showing the poor progression free survival of patients with chromothripsis and/or APOBEC.

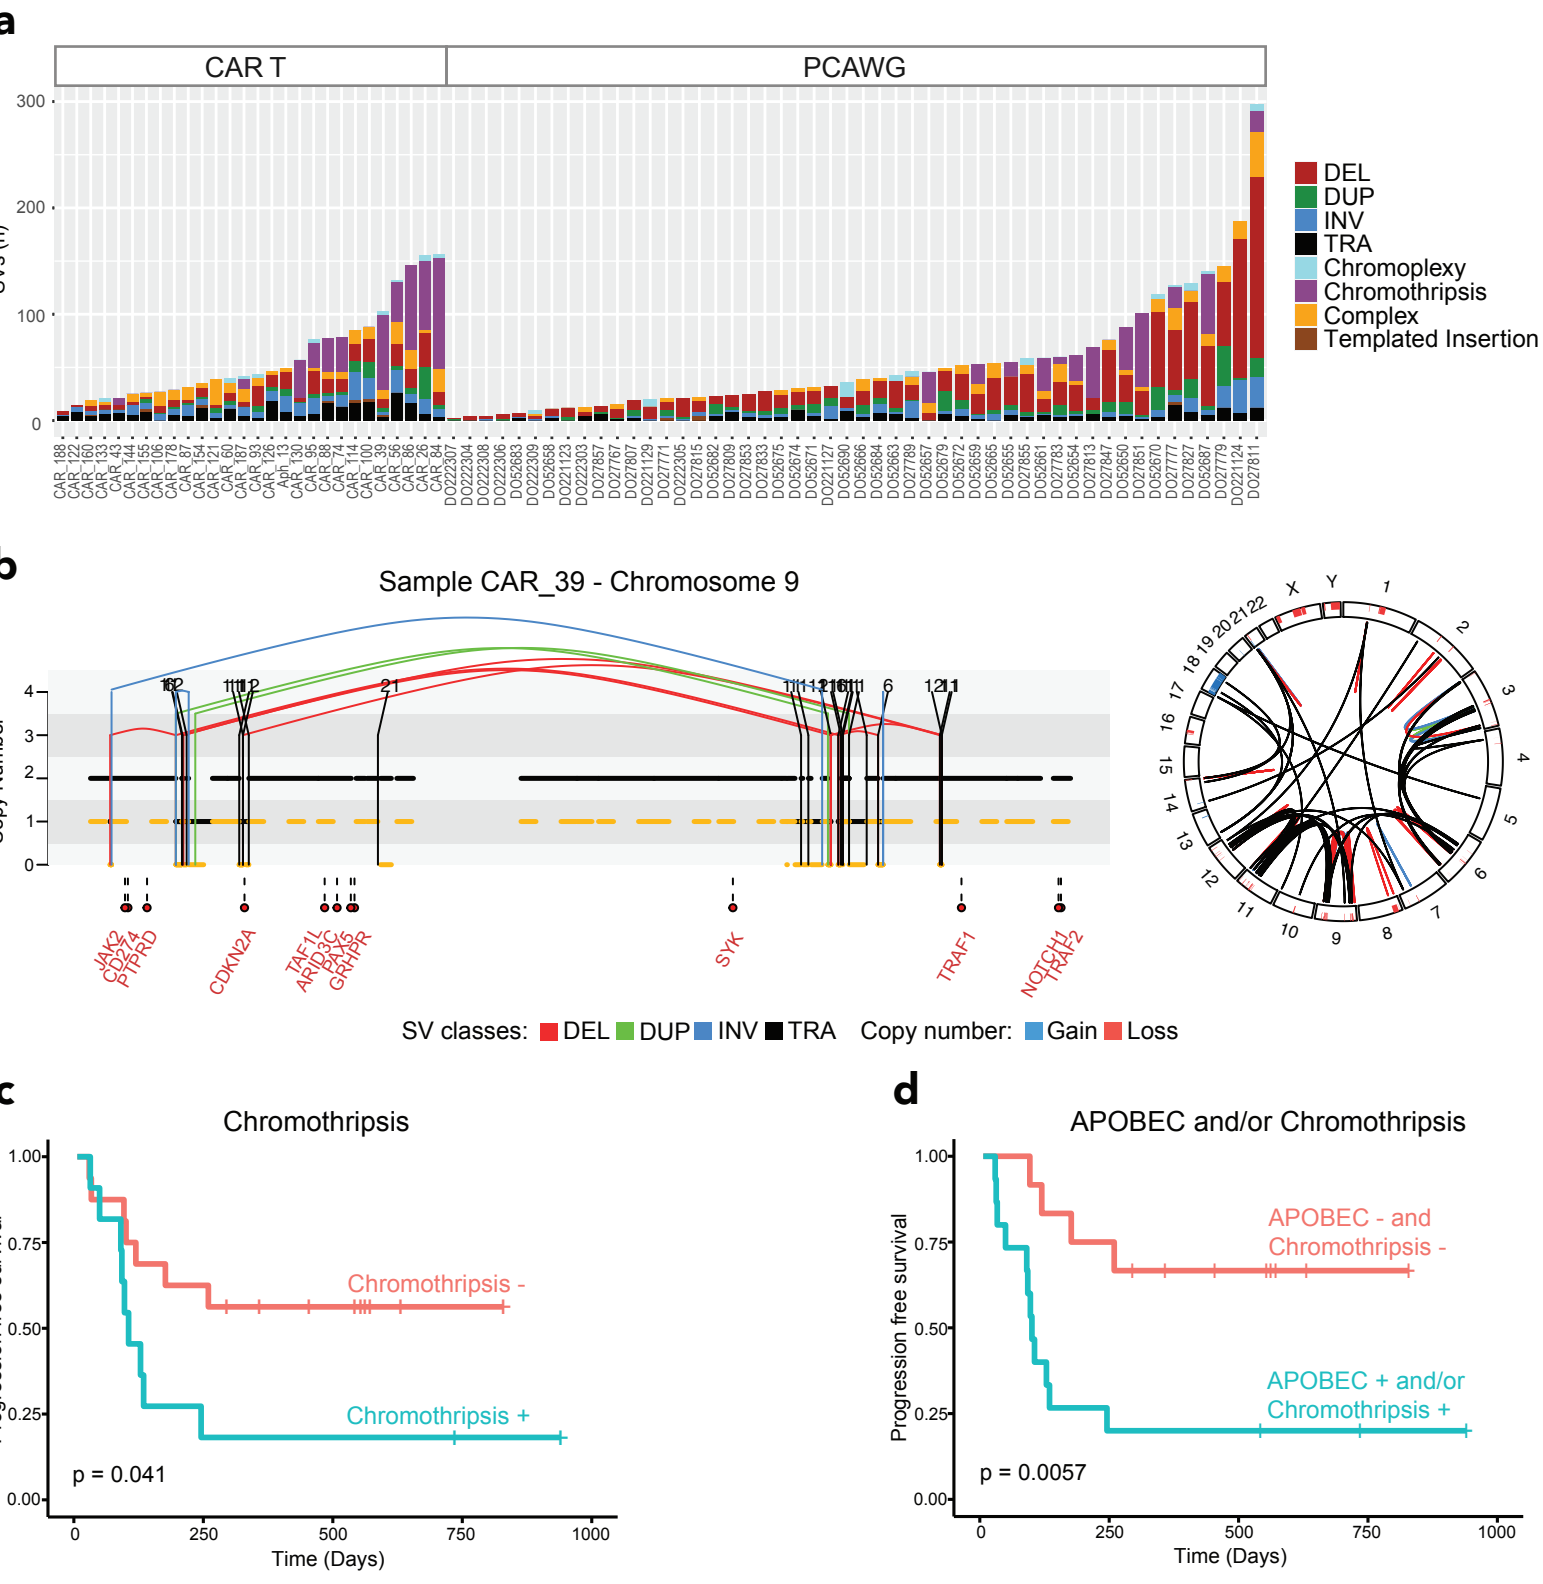

251 **Novel genomic features are detectable in nearly every CAR-19 failure.**

252 Here we identify a set of unique genomic features that correspond with poor prognosis for  
253 CAR-19 therapy in heavily pretreated, r/r LBCL patients. The most frequent and significant  
254 genomic features reported in this cohort and associated with poor outcome after CAR-19  
255 treatment were: chromothripsis, *RB1* deletions, *RHOA* deletions, APOBEC mutational signature,  
256 *NFKBIA* mutations and *MYC* mutations (**Figure 4a** and **Supplementary Figure 5**). Of the patients  
257 that progressed, 15/16 (93%) had at least one of these genomic features and this translates into  
258 worse PFS ( $p=0.0028$ , **Figure 4b**). Individually, all genomic features correlated with significantly  
259 worse PFS but only the presence of *MYC* mutations, chromothripsis events and *RHOA* deletions  
260 correlated with significantly worse OS. (**Supplementary Figure 4**). Interestingly, these features  
261 do not overlap with previously reported negative prognostic indicators in DLBCL including  
262 rearrangements of *BCL2*, *BCL6*, or *MYC*<sup>43–45</sup>.

263 It has been shown that distinct tumor immune microenvironmental patterns correlate with  
264 clinical outcome in patients treated with CAR-19<sup>12,13</sup>. In this study, we showed how distinct and  
265 complex genomic features in the tumor cells are strongly predictive of outcome in the same  
266 setting. To investigate a link between these two different assessments, we interrogated by RNA-  
267 seq the T-cell exhaustion landscape and IFN-signaling across 16 patients included in our study.  
268 The differential expression analysis (16 patients with also WGS data available) showed a higher  
269 expression level of genes known to be target of tumor signaling in patients treated with CAR-19  
270 (**Figure 4c**). Interestingly, the ISG.RS signature, previously described to be associated with T-  
271 cell exhaustion and worse outcome after immunotherapy<sup>12,48</sup>, was enriched in r/r patients  
272 harboring at least one reported genomic driver (**Figure 4d**), while the INFG.GS signature,  
273 associated with higher response to check point blockade, was enriched in patients without any  
274 significant genomic drivers (**Supplementary Figure 6**). Moreover, the cases containing at least  
275 one reported genomic driver were characterized by higher MTV, reflecting the relationship  
276 between disease aggressiveness and the TME (**Figure 4e**). Overall, these data suggest  
277 resistance to CAR-19 in r/r aggressive lymphoma is mediated by a complex interplay between  
278 distinct tumor genomic and immune microenvironment features.

**Fig.4 Impact of genomic alterations on clinical outcome and tumor microenvironment.** **a)** The heat-map shows all the genomic alterations associated with progression after CAR-19 cell therapy. **b)** Prognostic impact of all the genomic alteration associated with progression after CAR-19 cell therapy. **c)** The heatmap shows the z-scores for the IFN pathway genes, macrophage markers and CD19. **d)** Enrichment plot from GSEA showing the enrichment of the tumor IFN signature (ISG.RS) in patients with at least one significant genomic driver associated with progression after CAR-19 cell therapy. The vertical black bars indicate the position of the genes in the signature along the ranked gene list, the green line shows the enrichment score along the ranked gene list. The red to blue color bar shows the ranking of genes from up- to downregulated in patients with at least one genomic driver. **e)** The boxplot indicates the association between the metabolic tumor value (MTV in mL) and patients with at least one significant genomic driver. The p value was obtained with two tiled Fisher's exact test.

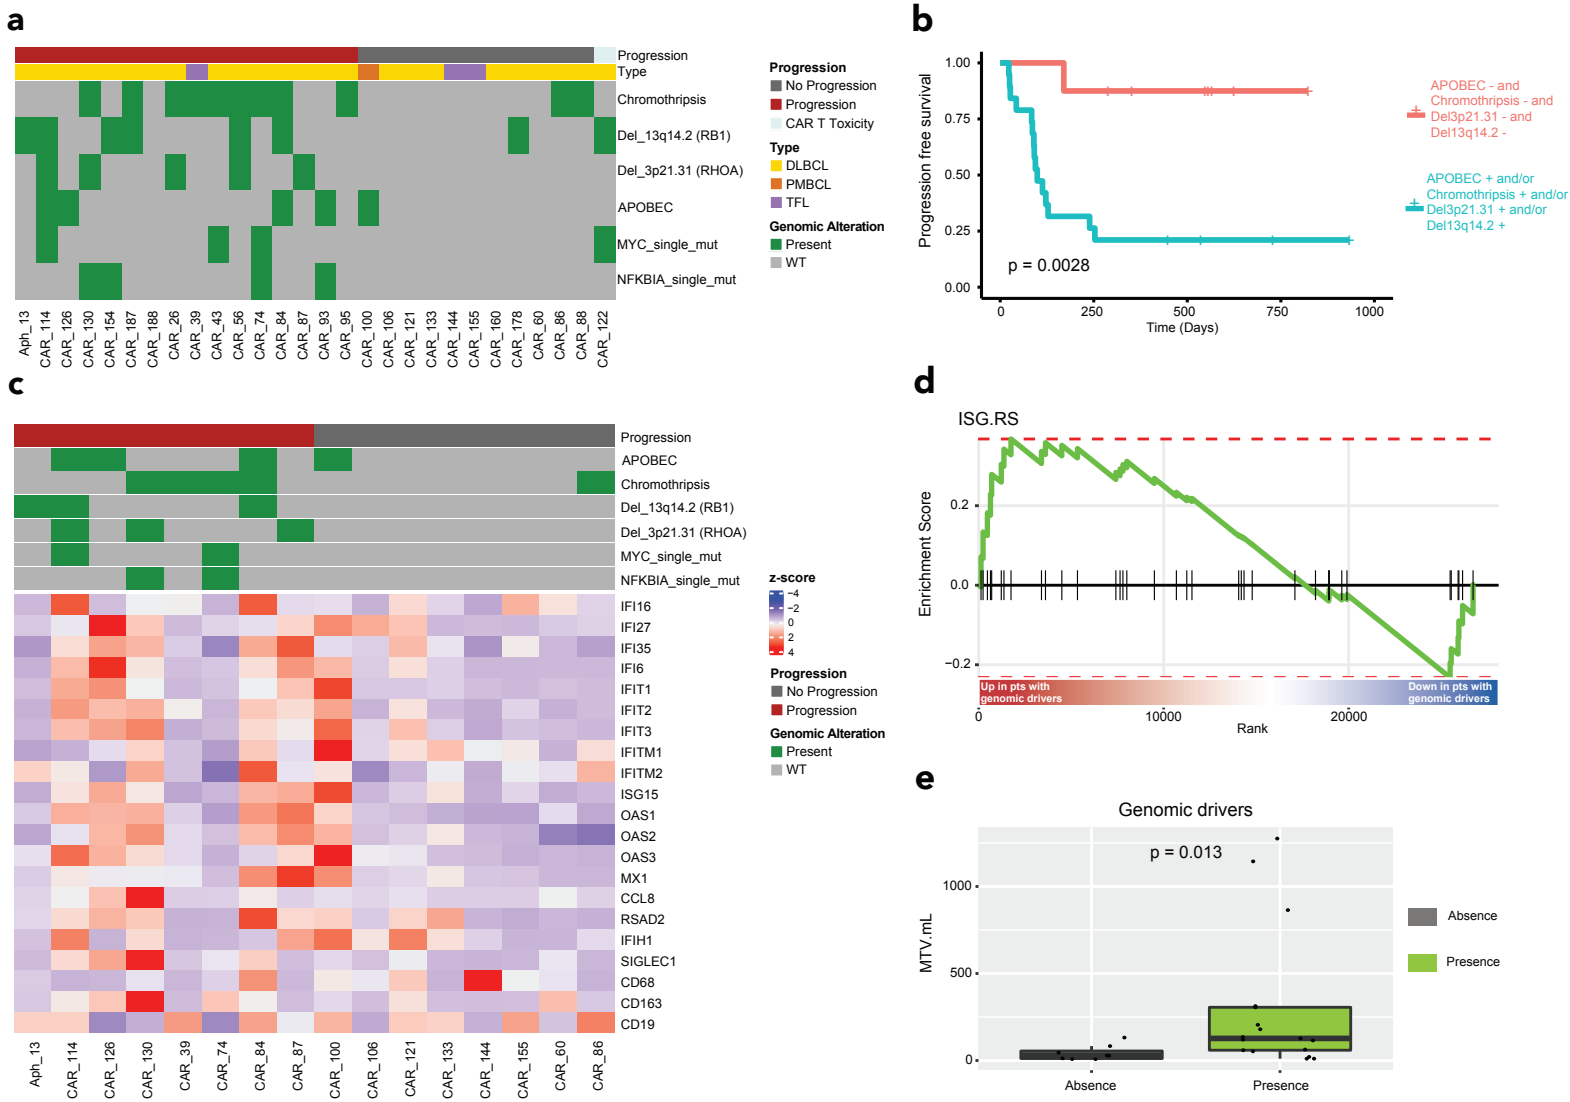



## 279 **Target-independent CAR-T anti-tumor activity**

280 Past studies have assessed loss of CD19 as a mechanism of resistance to CAR-19  
281 therapy<sup>49</sup>. Although individual examples of such cases demonstrate lack of response<sup>50</sup>, this  
282 mechanism of escape seems to explain only a small proportion of resistance in DLBCL<sup>51</sup>. In our  
283 cohort, pre-treatment CD19 expression was tested in 20 cases by flow cytometry, with 3 (15%)  
284 having reduced expression. Of these, two patients progressed, and one achieved a durable  
285 response. Additionally, all four CAR-19 relapse tumors were positive for CD19. At the genomic  
286 level, two cases showed a monoallelic copy number loss of *CD19* and one case had *CD19* sub-  
287 clonal mutation (L174V; 30% CCF). Strikingly, all three of these cases had durable CAR-19  
288 responses. The last case with CD19 L174V is an emblematic example reflecting the complexity  
289 of the anti-tumor activity promoted by CAR-19. An identical mutation was found as clonal at  
290 baseline in a patient that was completely refractory to CAR-19 treatment (**Figure 5A, top**)<sup>50</sup>. In  
291 line with this prior evidence, in our patient we would have expected a CAR CD19 mediated  
292 eradication of all CD19 wild type (wt) cells, but not of the one harboring CD19 L174V mutation  
293 (**Figure 5a, middle**). However, the CAR-19 infusion induced a complete tumor eradication (i.e.,  
294 both CD19 wt and CD19 L174V mutated clones) and an ongoing remission of more than 2 years  
295 post-CAR-19 infusion (**Figure 5a, bottom**). Taken together with 6/8 patients lacking CD19 who  
296 responded to axi-cel in the ZUMA-1 registration study<sup>6</sup> and with recent pre-clinical studies<sup>52,53</sup>,  
297 these findings indicate antigen-mediated tumor killing is not the only mechanism of tumor  
298 eradication, and alternate mechanisms may predominate.

**Fig.5 Model of the antigen-independent mechanisms of CAR-T mediated tumor-killing. a)** Genetic alterations of *CD19* in tumor cells do not always affect CAR-19 outcomes in r/r LBCL. **b)** The anti-tumor CAR-19 activity can be summarized in two main phases: 1) CAR-19 cells invade the TME and initiate attack on tumor; 2) the subsequent full clearance depends on successful overall host response (2).

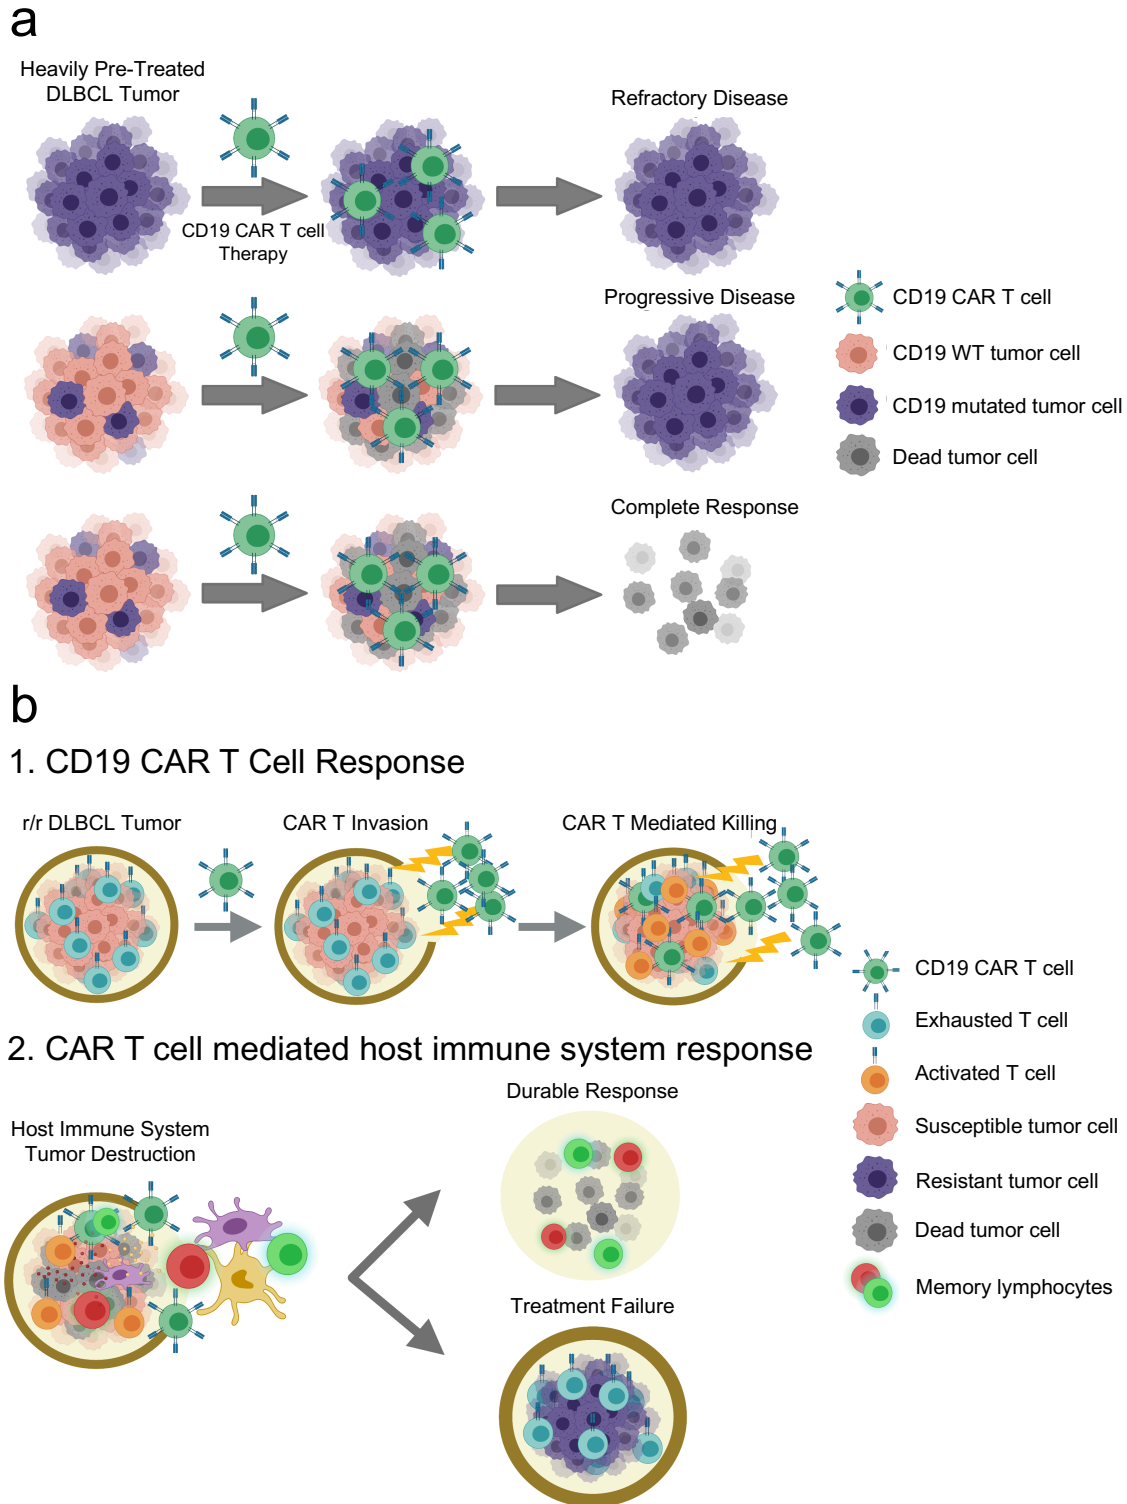

## 299 DISCUSSION

300 To our knowledge, these data provide the first unbiased genome-wide discovery of tumor-  
301 intrinsic factors associated with resistance to CAR-T therapy. Genomic complexity indicated by  
302 evidence of chromothripsis events and APOBEC mutational activity was detected in most r/r  
303 lymphomas that progressed after CAR-T therapy. Strikingly and independently, focal deletions in  
304 *RB1* and *RHOA* also strongly correlated with a poor CAR-19 response in these heavily pretreated,  
305 r/r patients. Together, at least one of these findings was present in 15/16 (93.8%) of cases  
306 assessable for response and that progressed after therapy. These specific genomic findings not  
307 only provide biomarkers predictive of poor response to CAR-19 in r/r DLBCL patients but more  
308 importantly emphasize the need for functional studies to elucidate the mechanisms of these  
309 events in both primary and r/r disease. Some of these findings, such as chromothripsis and  
310 APOBEC, have been linked to more aggressive and resistant tumors<sup>45,47</sup>. The role of  
311 chromothripsis and APOBEC in newly diagnosed DLBCL has not been tested in prior studies,  
312 and the low number of progressed cases in the PCAWG dataset does not allow for a proper  
313 investigation (n=3). However, our data suggest patients with chromothripsis and/or APOBEC  
314 generally fail CAR-19 and present high-risk and exhausted microenvironmental patterns. The idea  
315 that complex genomic features and genomic instability are linked to a more immunosuppressed  
316 environment is not new<sup>54</sup>, but this is the first evidence from clinical samples showing it in the  
317 context of CAR-19 therapy.

318 Focal deletions of *RB1* or *RHOA* also correlated with lack of durable response to CAR-19.  
319 Given the crucial role of *RB1* in regulating cell cycle progression, the mechanism of progression  
320 in these patients could be directly related to overall tumor burden as the CAR-T response seems  
321 to not be able to overcome significant bulky disease<sup>11,21</sup>. As a matter of the fact, patients with *RB1*  
322 deletion had significant higher MTV compared to patients without any genomic features  
323 associated with CAR-19 resistance (p=0.026). The *RHOA* protein, meanwhile, affects a wide  
324 range of cellular processes in diffuse cell types, and its mechanisms as a DLBCL tumor  
325 suppressor remain to be clearly defined. Studies to date show increased motility of malignant and  
326 pre-malignant B lymphocytes in *RHOA* loss-of-function experiments<sup>55,56</sup>. Therefore, dissemination  
327 to tissues or niches in the TME that provide sanctuary from CAR-19-initiated immunity is one  
328 hypothesis. Given the prevalence of *RHOA* deletions in de novo DLBCL<sup>23,57</sup> and now also  
329 correlation with poor prognosis to CAR-19, detailed laboratory studies are warranted to explore  
330 the role of these focal deletions in DLBCL and assess their impact on CAR-T response.

331 We provide cell-intrinsic alternatives to loss of the CD19 CAR target, a mechanism that,  
332 while logical, appears to be of unclear real-world importance<sup>52,53</sup>. In this cohort, genomic  
333 alterations of *CD19* or reduced expression by flow cytometry did not significantly affect outcome,  
334 revealing for the first time that the CD19-independent genomic drivers of CAR-19 resistance  
335 appear by far the more clinically important and inter-connected with the TME. Moreover, durable  
336 responses in cases with *CD19* monoallelic deletion or sub-clonal mutation demonstrate antigen-  
337 independent clearance can play a key role in clinical responses to CAR-19. Taken alone, these  
338 findings would be hypothesis generating, but they are in fact highly consistent with multiple  
339 published clinical and preclinical observations. For example, multiplex immunostaining of samples  
340 from axi-cel treated patients recently showed  $\leq 5\%$  of TME T cells were CAR-positive five days  
341 after infusion, but the CAR-negative cells were diffusely activated and likely contributed to both  
342 therapeutic efficacy and CRS toxicity<sup>58</sup>. Therefore, though individual case studies have implicated  
343 antigen loss as a mechanism of CAR-T resistance<sup>49,50,59</sup>, this does not account for the majority of  
344 resistant cases. Quantitative flow cytometry recently suggested lower pretreatment density of  
345 CD19 molecules per tumor cell associated with worse CAR-19 responses in LBCL<sup>15</sup>, but it was  
346 not possible to carry out this specialized assessment in our cohort for comparison to genotypes.  
347 We propose that an essential mechanism of CD19 CAR-T cells is to penetrate the exhausted  
348 TME providing access for the host immune system to attack the tumor (**Figure 5b**). In this  
349 scenario, the CAR-T cells act as a gateway into the immunosuppressed TME to allow the host  
350 immune system to destroy the tumor. Data from axi-cel-treated patients showed that patients with  
351 high serum inflammatory markers, along with increased tumor IFN signaling were indicative of  
352 lack of durable response<sup>12</sup>. Recent studies by Alizadeh et al<sup>53</sup> demonstrated that CAR-T cells  
353 secrete IFN gamma and activate host T cells in a mouse model of glioblastoma and these cells  
354 preserved their anti-tumor activity also when infused without CAR-T. Combining these results with  
355 our genomics data, the role of the CAR-T cells in invigorating the host immune response in an  
356 exhausted TME emerges as the key to maintaining a durable response to CAR-T in *r/r* DLBCL  
357 patients. At the same time our data reveal that genomically complex and unstable tumors have a  
358 high degree of exhaustion and immunosuppression, and this creates a perfect storm of conditions  
359 for limiting the CAR-T activity and clinical efficacy.

360 Many CAR-T products are under development for use in various solid and hematologic  
361 malignancies with mixed efficacies<sup>1,2</sup>. This model of CAR-T resistance might be applicable to  
362 diseases such as multiple myeloma, where, APOBEC and chromothripsis are more frequent and  
363 an even higher percentage of patients relapse after CAR-T compared to DLBCL<sup>29,45,46,60</sup>. Clearly,  
364 further research is warranted to understand the role of the CAR-19 cells on the tumor

365 microenvironment and subsequently identify ways to bolster the response to CAR-T through  
366 reactivation of the host immune system against the tumor.

367

## 368 **METHODS**

### 369 **Patients and Samples**

370 **Patients:** Patient characteristics and clinical outcomes for our cohort of 31 r/r LBCL patients are  
371 recorded in Table 1 and germline and tumor samples were collected prospectively following  
372 established international review board protocols<sup>12</sup>. Research was conducted in accordance with  
373 the Declaration of Helsinki. WGS was performed for patients with adequate samples at the time  
374 of analysis without further selection. Durable responders (non-progressors) were defined as  
375 patients who maintained remission after a minimum follow-up of 6 months after CAR19 infusion.  
376 Non-durable responders (progressors) had lymphoma recurrence or died from any cause.

377 To increase the statistical power in several analyses we included in this study 50 newly diagnosed  
378 DLBCL cases from PCAWG<sup>26</sup>, after removing the sample carrying the BRCA mutation.

379

380 **Sample Collection & DNA Extraction:** Patient samples were received as frozen peripheral blood  
381 mononuclear cells or viably preserved tumor biopsies and then thawed at 37C in a water bath.  
382 Once thawed, the samples were spun at room temperature at 3000g for 5 minutes. The cell pellets  
383 were washed once with phosphate buffered saline before being processing for nucleic acid  
384 extraction. The AllPrep DNA/RNA Mini Kit (Qiagen, Cat. #80284) was used to extract DNA and  
385 the samples were eluted in water.

386

387 **Whole Genome Sequencing** – WGS library construction and sequencing were performed at the  
388 Center for Genome Technology at the John P. Hussman Institute for Human Genomics, University  
389 of Miami Miller School of Medicine. First, all DNA samples were evaluated for concentration by  
390 fluorometric Qubit assays (Thermo-Fisher) and for integrity by TapeStation (Agilent  
391 Technologies). Sequencing libraries were prepared using the TruSeq DNA PCR-free HT sample  
392 preparation kit from Illumina. Briefly, one ug of total genomic DNA was fragmented using the  
393 Covaris LE220 focus acoustic sonicator to a target size of 350bp. Blunt-end DNA fragments were  
394 generated and size selection performed with AMPure bead purification (Beckman Coulter). A-  
395 base tailing was performed on the 3' blunt ends followed by adapter ligation and a bead-based

396 clean-up of the libraries. Final library fragment size was evaluated on the TapeStation (Agilent  
397 Technologies) and final molarity quantification determined by qPCR with adapter specific primers  
398 (Kapa Biosystems) on a Roche Light Cycler. Libraries were normalized to 2.8nM and 24-samples  
399 pooled for sequencing on a S4-300 flow cell on the NovaSeq 6000. Paired-end 150bp reads were  
400 generated to yield an average depth of 30x per sample. FASTQ files were generated using the  
401 Illumina BCL2FASTQ algorithm and used for downstream processing.

402

### 403 **Whole genome sequencing analysis**

404 Raw FASTQ files were uploaded to the Illumina BaseSpace Sequence Hub for  
405 downstream processing. Tumor and normal paired samples were aligned against the GRCh38  
406 genome build and somatic single nucleotide variants (SNVs) and short insertion-deletions variants  
407 (indels) were called using the DRAGEN Somatic Pipeline Version 3.6.3. We performed additional  
408 filters to the only "PASS" calls, to remove artifactual variants. We excluded variants based on at  
409 least 1 of following filters: calls were unidirectional; an alternative allele was present in matched  
410 normal; the C>A/G>T variants had a frequency <0.1 (oxoG artifacts). We applied the *dN/dScv*  
411 method to detect genes under positive selection in *r/r* cases. To increase the statistical power we  
412 included 50 newly diagnosed DLBCL samples from PCAWG<sup>26</sup>. The algorithm estimates the  
413 excess of nonsynonymous mutations while accounting for the mutational spectrum and gene-  
414 specific mutation rates<sup>25</sup>. Then, we evaluated which results were enriched in our cohort using a  
415 two-tailed Fisher's exact test and correction for multiple testing using false discovery rate (FDR).

416 CNVs were called with Sequenza Version 3.0.0 algorithm<sup>61</sup> as previously described in  
417 DLBCL<sup>62</sup>. The genome regions that were significantly modified in our samples were identified by  
418 using *GISTIC* (v2.0.23)<sup>42</sup>. To improve the test's statistical power, we run our *r/r* samples (n = 28)  
419 with the baseline DLBCL PCAWG samples (n = 50). In this way we were able to detect the  
420 anomalous peaks shared among all the samples, and subsequently to identify which of these  
421 were enriched in our *r/r* cohort, using a one tailed Fisher's exact test. The analysis was executed  
422 using Gene Pattern web interface (<http://genepattern.broadinstitute.org>) and setting a q value  
423 threshold of 0.01. To determinate the tumor clonal architecture, and to model clusters of clonal  
424 and sub-clonal points mutations, we combined SNV and CNV data using the *PyClone-VI*  
425 (v0.1.0)<sup>63</sup>.

426 Mutational signature analysis of SBS was performed following three main steps: 1) *de*  
427 *novo* extraction, 2) assignment, and 3) fitting<sup>31</sup>. For the *novo* extraction of mutational signatures,



428 we run *SigProfiler* and hdp algorithms<sup>28,29</sup>, combining our 28 r/r samples together with 50 baseline  
429 PCAWG samples. Next, the extracted process active in our cohort was assigned to one or more  
430 mutational signatures included in the latest COSMIC v3.2 catalog  
431 (<https://cancer.sanger.ac.uk/signatures/sbs>). Finally, the 28 r/r samples were run with a fitting  
432 algorithm designed for hematological cancers, *mmsig*<sup>34</sup>. It confirms and estimates the contribution  
433 of each mutational signature in each sample. Confidence intervals were generated by drawing  
434 1000 mutational profiles from the multinomial distribution, each time repeating the signature fitting  
435 procedure, and finally taking the 2.5<sup>th</sup> and 97.5<sup>th</sup> percentile for each signature. Mutational  
436 signature analysis of DBS was performing using *SigProfiler* algorithm to *de novo* extraction and  
437 assignment with COSMICv.2 signatures catalog, combining our cohort with PCAWG cohort.

438 To detect the SVs, deletions, inversion, translocations and tandem duplications, we used  
439 *Manta*. Complex events such as chromothripsis, chromoplexy, templated insertions were defined  
440 after manual inspection as previously described<sup>43,45,46,64,65</sup>. Templated insertions were defined by  
441 translocations associated with copy number gain, resulting in concatenation of amplified  
442 segments from two or more chromosomes into a continuous stretch of DNA, inserted into any of  
443 the involved chromosomes. Chromoplexy connected segments from multiple chromosomes, but  
444 they are associated with copy number loss. Chromothripsis was defined by the presence of 10 or  
445 more interconnected SV breakpoint pairs associated with a shattering and random rejoining of  
446 one or more chromosomes with oscillating copy number<sup>64</sup>. Patterns of three or more  
447 interconnected breakpoint pairs that did not fall into either of the above categories were classified  
448 as unspecified complex. All SVs not part of a complex event were classified as single<sup>45,46</sup>.

449

## 450 **RNA sequencing analysis**

451 The RNA sequencing (RNA-seq) libraries were prepared with the NuGen RNA-Seq Multiplex  
452 System (Tecan US) as previously described<sup>12</sup>. The libraries were sequenced on the Illumina  
453 NextSeq 500 system with a 75 base paired end run at 80 to 100 million read pairs per sample.  
454 RNA-seq reads were mapped to the reference human genome (GRCh38) using the STAR  
455 algorithm<sup>66</sup>, and the parameters were set to count read numbers per gene while mapping. To  
456 analyze the gene expression profile, we used the DESeq2 R package<sup>67</sup>. First, the dataset of raw  
457 counts was filtered to remove genes with <10 reads in >95% of samples. Then, we performed the  
458 library size normalization, followed by the gene expression analysis. Nominal p values were  
459 corrected for multiple testing by using the Benjamini-Hochberg FDR method.



460 The Gene Set Enrichment Analysis (GSEA)<sup>68</sup> was performed using the fgsea<sup>69</sup> R package. The  
461 H Hallmark gene sets collection, retrieved from MSigDb database v 7.4<sup>70</sup>, was enriched with  
462 two INF signatures, ISG.RS and IFNG.GS, previously described to be associated with response  
463 to immunotherapy<sup>12,48</sup>. Genes were ranked using the statistic derived from differential  
464 expression analysis with DESeq function.

465

### 466 **Chapuy et al Clustering**

467 Samples were clustered according to the Chapuy clustering system methods<sup>23</sup> using the SV,  
468 CNV and mutation data.

469

### 470 **LymphGen Clustering**

471 Using the publicly available LymphGen Classifier<sup>24</sup> (<https://llmpp.nih.gov/lymphgen/index.php>),  
472 samples were categorized into the various subtypes based on the SV, CNV and mutational  
473 data.

474

### 475 **Statistics**

476 The comparison tests have been performed with Fisher's exact test. Association of categorial  
477 variables with progression free survival (PFS) and overall survival (OS) were performed in a  
478 univariable fashion using Kaplan-Meier curves and a log-rank test. All analyses were performed  
479 in R, the language and environment for statistical computing (R Core Team, 2021).

480

### 481 **DATA AVAILABILITY**

482 Submission of raw data to the European Genome-phenome Archive (EGA) is in progress.  
483 PCAWG data are available at <https://dcc.icgc.org/> and EGAS00001001692 [[https://ega-  
484 archive.org/studies/EGAS00001001692](https://ega-archive.org/studies/EGAS00001001692)];

485

### 486 **ACKNOWLEDGEMENTS**

487 This work was supported by grant award from the Florida Academic Cancer Center Alliance (to  
488 J.H.S. and M.L.D.) and the Sylvester Comprehensive Cancer Center NCI Core Grant (P30 CA  
489 240139 to J.H.S and F.M.).

490 F.M. is supported by the American Society of Hematology.

491

492 **AUTHOR CONTRIBUTIONS**

493 F.M., F.L.L., J.H.S., M.L.D. designed and supervised the study, collected, and analyzed the data  
494 and wrote the paper.

495 C.A.C., B.Z., M.D.J., collected, analyzed and interpreted the data and wrote the paper.

496 A.J.G. analyzed the data

497 O.L., R.F., and K.M.R collected the data

498

499 All authors read, revised, proofed the manuscript

500

501 **CONFLICT OF INTEREST**

502 O.L. has received research funding from: National Institutes of Health (NIH), National Cancer  
503 Institute (NCI), U.S. Food and Drug Administration (FDA), Multiple Myeloma Research  
504 Foundation (MMRF), International Myeloma Foundation (IMF), Leukemia and Lymphoma Society  
505 (LLS), Perelman Family Foundation, Rising Tide Foundation, Amgen, Celgene, Janssen, Takeda,  
506 Glenmark, Seattle Genetics, Karyopharm; Honoraria/ad boards: Adaptive, Amgen, Binding Site,  
507 BMS, Celgene, Celectis, Glenmark, Janssen, Juno, Pfizer; and serves on Independent Data  
508 Monitoring Committees (IDMCs) for clinical trials lead by Takeda, Merck, Janssen, Theradex.

509 M.D.J. reports a consultancy/advisory role for Kite/Gilead, Novartis, Takeda, and BMS.

510 M.L.D. reports research funding from Celgene, Novartis, and Atara; other financial support from  
511 Novartis, Precision Biosciences, Celyad, Bellicum, and GlaxoSmithKline; and stock options from  
512 Precision Biosciences, Adaptive, and Anixa.

513 F.L.L. reports an advisory role for Kite/Gilead, BMS/Celgene, Novartis, Amgen, Allogene, Wugen,  
514 Calibr, Iovance, Janssen, and GammaDelta Therapeutics; reports a consultancy/advisory role for  
515 Cellular Biomedicine Group; and has received research funding from Kite/Gilead.

516 The remaining authors declare no competing financial interests.

517 **REFERENCES**

518

- 519 1. Brudno, J. N. & Kochenderfer, J. N. Chimeric antigen receptor T-cell therapies for  
520 lymphoma. *Nat. Rev. Clin. Oncol.* **15**, 31–46 (2018).
- 521 2. Sterner, R. C. & Sterner, R. M. CAR-T cell therapy: current limitations and potential  
522 strategies. *Blood Cancer J.* **11**, 69 (2021).
- 523 3. Vairy, S., Lopes Garcia, J., Teira, P. & Bittencourt, H. CTL019 (tisagenlecleucel): CAR-T  
524 therapy for relapsed and refractory B-cell acute lymphoblastic leukemia. *Drug Des. Devel.*  
525 *Ther.* **Volume 12**, 3885–3898 (2018).
- 526 4. Locke, F. L. *et al.* Phase 1 Results of ZUMA-1: A Multicenter Study of KTE-C19 Anti-CD19  
527 CAR T Cell Therapy in Refractory Aggressive Lymphoma. *Mol. Ther.* **25**, 285–295 (2017).
- 528 5. Locke, F. L. *et al.* Long-term safety and activity of axicabtagene ciloleucel in refractory large  
529 B-cell lymphoma (ZUMA-1): a single-arm, multicentre, phase 1–2 trial. *Lancet Oncol.* **20**,  
530 31–42 (2019).
- 531 6. Neelapu, S. S. *et al.* Axicabtagene Ciloleucel CAR T-Cell Therapy in Refractory Large B-  
532 Cell Lymphoma. *N. Engl. J. Med.* **377**, 2531–2544 (2017).
- 533 7. Nastoupil, L. J. *et al.* Standard-of-Care Axicabtagene Ciloleucel for Relapsed or Refractory  
534 Large B-Cell Lymphoma: Results From the US Lymphoma CAR T Consortium. *J. Clin.*  
535 *Oncol.* **38**, 3119–3128 (2020).
- 536 8. Schuster, S. J. *et al.* Chimeric Antigen Receptor T Cells in Refractory B-Cell Lymphomas. *N.*  
537 *Engl. J. Med.* **377**, 2545–2554 (2017).
- 538 9. Schuster, S. J. *et al.* Tisagenlecleucel in Adult Relapsed or Refractory Diffuse Large B-Cell  
539 Lymphoma. *N. Engl. J. Med.* **380**, 45–56 (2019).
- 540 10. Jacobson, C. A. *et al.* Axicabtagene Ciloleucel in the Non-Trial Setting: Outcomes and  
541 Correlates of Response, Resistance, and Toxicity. *J. Clin. Oncol.* JCO.19.02103 (2020)  
542 doi:10.1200/JCO.19.02103.

- 543 11. Vercellino, L. *et al.* Predictive factors of early progression after CAR T-cell therapy in  
544 relapsed/refractory diffuse large B-cell lymphoma. **4**, 9 (2020).
- 545 12. Jain, M. D. *et al.* Tumor interferon signaling and suppressive myeloid cells associate with  
546 CAR T cell failure in large B cell lymphoma. *Blood* blood.2020007445 (2021)  
547 doi:10.1182/blood.2020007445.
- 548 13. Deng, Q. *et al.* Characteristics of anti-CD19 CAR T cell infusion products associated with  
549 efficacy and toxicity in patients with large B cell lymphomas. *Nat. Med.* **26**, 1878–1887  
550 (2020).
- 551 14. Wang, N. *et al.* Efficacy and safety of CAR19/22 T-cell cocktail therapy in patients with  
552 refractory/relapsed B-cell malignancies. *Blood* **135**, 17–27 (2020).
- 553 15. Spiegel, J. Y. *et al.* CAR T cells with dual targeting of CD19 and CD22 in adult patients with  
554 recurrent or refractory B cell malignancies: a phase 1 trial. *Nat. Med.* 1–13 (2021)  
555 doi:10.1038/s41591-021-01436-0.
- 556 16. Shah, N. N. *et al.* Bispecific anti-CD20, anti-CD19 CAR T cells for relapsed B cell  
557 malignancies: a phase 1 dose escalation and expansion trial. *Nat. Med.* **26**, 1569–1575  
558 (2020).
- 559 17. Collinge, B. *et al.* The impact of MYC and BCL2 structural variants in tumors of DLBCL  
560 morphology and mechanisms of false-negative MYC IHC. *Blood* **137**, 2196–2208 (2021).
- 561 18. Ennishi, D. *et al.* Double-Hit Gene Expression Signature Defines a Distinct Subgroup of  
562 Germinal Center B-Cell-Like Diffuse Large B-Cell Lymphoma. *J. Clin. Oncol.* JCO.18.01583  
563 (2018) doi:10.1200/JCO.18.01583.
- 564 19. Green, T. M. *et al.* Immunohistochemical Double-Hit Score Is a Strong Predictor of Outcome  
565 in Patients With Diffuse Large B-Cell Lymphoma Treated With Rituximab Plus  
566 Cyclophosphamide, Doxorubicin, Vincristine, and Prednisone. *J. Clin. Oncol.* **30**, 3460–  
567 3467 (2012).

- 568 20. Johnson, N. A. *et al.* Concurrent Expression of MYC and BCL2 in Diffuse Large B-Cell  
569 Lymphoma Treated With Rituximab Plus Cyclophosphamide, Doxorubicin, Vincristine, and  
570 Prednisone. *J. Clin. Oncol.* **30**, 3452–3459 (2012).
- 571 21. Dean, E. A. *et al.* High metabolic tumor volume is associated with decreased efficacy of  
572 axicabtagene ciloleucel in large B-cell lymphoma. **4**, 9 (2020).
- 573 22. Malek, E. *et al.* Metabolic tumor volume on interim PET is a better predictor of outcome in  
574 diffuse large B-cell lymphoma than semiquantitative methods. *Blood Cancer J.* **5**, e326–  
575 e326 (2015).
- 576 23. Chapuy, B. *et al.* Molecular subtypes of diffuse large B cell lymphoma are associated with  
577 distinct pathogenic mechanisms and outcomes. *Nat. Med.* **24**, 679–690 (2018).
- 578 24. Wright, G. W. *et al.* A Probabilistic Classification Tool for Genetic Subtypes of Diffuse Large  
579 B Cell Lymphoma with Therapeutic Implications. *Cancer Cell* **37**, 551-568.e14 (2020).
- 580 25. Martincorena, I. *et al.* Universal Patterns of Selection in Cancer and Somatic Tissues. *Cell*  
581 **171**, 1029-1041.e21 (2017).
- 582 26. The ICGC/TCGA Pan-Cancer Analysis of Whole Genomes Consortium. Pan-cancer  
583 analysis of whole genomes. *Nature* **578**, 82–93 (2020).
- 584 27. Rushton, C. K. *et al.* Genetic and evolutionary patterns of treatment resistance in relapsed  
585 B-cell lymphoma. **4**, 13 (2020).
- 586 28. Alexandrov, L. B. *et al.* The repertoire of mutational signatures in human cancer. *Nature*  
587 **578**, 28 (2020).
- 588 29. Rustad, E. H. *et al.* Timing the initiation of multiple myeloma. *Nat. Commun.* **11**, 1917  
589 (2020).
- 590 30. Maura, F. *et al.* The mutagenic impact of melphalan in multiple myeloma. *Leukemia* (2021)  
591 doi:10.1038/s41375-021-01293-3.
- 592 31. Maura, F. *et al.* A practical guide for mutational signature analysis in hematological  
593 malignancies. *Nat. Commun.* **10**, 12 (2019).

- 594 32. Pich, O. *et al.* The mutational footprints of cancer therapies. *Nat. Genet.* **51**, 1732–1740  
595 (2019).
- 596 33. Landau, H. J. Accelerated single cell seeding in relapsed multiple myeloma. *Nat. Commun.*  
597 **11**, 10 (2020).
- 598 34. Rustad, E. H. *et al.* mmsig: a fitting approach to accurately identify somatic mutational  
599 signatures in hematological malignancies. *Commun. Biol.* **4**, 424 (2021).
- 600 35. Kucab, J. E. *et al.* A Compendium of Mutational Signatures of Environmental Agents. *Cell*  
601 **177**, 821-836.e16 (2019).
- 602 36. Petljak, M. & Maciejowski, J. Molecular origins of APOBEC-associated mutations in cancer.  
603 *DNA Repair* **94**, 102905 (2020).
- 604 37. Maura, F. *et al.* Biological and prognostic impact of APOBEC-induced mutations in the  
605 spectrum of plasma cell dyscrasias and multiple myeloma cell lines. *Leukemia* **32**, 1043–  
606 1047 (2018).
- 607 38. D'Entropio, S. C. *et al.* Characterizing genetic intra-tumor heterogeneity across 2,658 human  
608 cancer genomes. *Cell* **184**, 2239-2254.e39 (2021).
- 609 39. Priestley, P. *et al.* Pan-cancer whole-genome analyses of metastatic solid tumours. *Nature*  
610 **575**, 210–216 (2019).
- 611 40. McGranahan, N. *et al.* Allele-Specific HLA Loss and Immune Escape in Lung Cancer  
612 Evolution. *Cell* **171**, 1259-1271.e11 (2017).
- 613 41. Wagener, R. *et al.* Analysis of mutational signatures in exomes from B-cell lymphoma cell  
614 lines suggest APOBEC3 family members to be involved in the pathogenesis of primary  
615 effusion lymphoma. *Leukemia* **4** (2015) doi:doi:10.1038/leu.2015.22.
- 616 42. Mermel, C. H. *et al.* GISTIC2.0 facilitates sensitive and confident localization of the targets  
617 of focal somatic copy-number alteration in human cancers. *Genome Biol.* **12**, R41 (2011).
- 618 43. Li, Y. *et al.* Patterns of somatic structural variation in human cancer genomes. *Nature* **578**,  
619 112–121 (2020).

- 620 44. Hadi, K. *et al.* Distinct Classes of Complex Structural Variation Uncovered across  
621 Thousands of Cancer Genome Graphs. *Cell* **183**, 197-210.e32 (2020).
- 622 45. Rustad, E. H. *et al.* Revealing the Impact of Structural Variants in Multiple Myeloma. *Blood*  
623 *Cancer Discov.* **1**, 258–273 (2020).
- 624 46. Maura, F. *et al.* Genomic landscape and chronological reconstruction of driver events in  
625 multiple myeloma. *Nat. Commun.* **10**, 3835 (2019).
- 626 47. Cortés-Ciriano, I. *et al.* Comprehensive analysis of chromothripsis in 2,658 human cancers  
627 using whole-genome sequencing. *Nat. Genet.* **52**, 331–341 (2020).
- 628 48. Benci, J. L. *et al.* Tumor Interferon Signaling Regulates a Multigenic Resistance Program to  
629 Immune Checkpoint Blockade. *Cell* **167**, 1540-1554.e12 (2016).
- 630 49. Majzner, R. G. & Mackall, C. L. Tumor Antigen Escape from CAR T-cell Therapy. *Cancer*  
631 *Discov.* **8**, 1219–1226 (2018).
- 632 50. Zhang, Z. *et al.* Point mutation in CD19 facilitates immune escape of B cell lymphoma from  
633 CAR-T cell therapy. *J Immunother Cancer* **11** (2020) doi:10.1136/jitc-2020-001150.
- 634 51. Chong, E. A., Ruella, M. & Schuster, S. J. Five-Year Outcomes for Refractory B-Cell  
635 Lymphomas with CAR T-Cell Therapy. *N. Engl. J. Med.* **2** (2021).
- 636 52. Boulch, M. *et al.* A cross-talk between CAR T cell subsets and the tumor microenvironment  
637 is essential for sustained cytotoxic activity. *Sci. Immunol.* **6**, 4344 (2021).
- 638 53. Alizadeh, D. *et al.* IFN $\gamma$  is Critical for CAR T Cell Mediated Myeloid Activation and Induction  
639 of Endogenous Immunity. *Cancer Discov.* **29** (2021) doi:10.1158/2159-8290.CD-20-1661.
- 640 54. Hegde, P. S. & Chen, D. S. Top 10 Challenges in Cancer Immunotherapy. *Immunity* **52**, 19  
641 (2020).
- 642 55. Jiang, X. *et al.* HGAL, a germinal center specific protein, decreases lymphoma cell motility  
643 by modulation of the RhoA signaling pathway. *Blood* **116**, 5217–5227 (2010).
- 644 56. Muppidi, J. R. *et al.* Loss of signalling via G $\alpha$ 13 in germinal centre B-cell-derived lymphoma.  
645 *Nature* **516**, 254–258 (2014).



- 646 57. O'Hayre, M. *et al.* Inactivating mutations in GNA13 and RHOA in Burkitt's lymphoma and  
647 diffuse large B-cell lymphoma: a tumor suppressor function for the Gα 13 /RhoA axis in B  
648 cells. *Oncogene* **35**, 3771–3780 (2016).
- 649 58. Chen, P.-H. *et al.* Activation of CAR and non-CAR T cells within the tumor  
650 microenvironment following CAR T cell therapy. *JCI Insight* **5**, (2020).
- 651 59. Sotillo, E. *et al.* Convergence of Acquired Mutations and Alternative Splicing of CD19  
652 Enables Resistance to CART-19 Immunotherapy. *Cancer Discov.* **5**, 25 (2015).
- 653 60. Munshi, N. C. *et al.* Idecabtagene Vicleucel in Relapsed and Refractory Multiple Myeloma.  
654 *N. Engl. J. Med.* **384**, 705–716 (2021).
- 655 61. Favero, F. *et al.* Sequenza: allele-specific copy number and mutation profiles from tumor  
656 sequencing data. *Ann. Oncol.* **26**, 64–70 (2015).
- 657 62. Arthur, S. E. *et al.* Genome-wide discovery of somatic regulatory variants in diffuse large B-  
658 cell lymphoma. *Nat. Commun.* **9**, 4001 (2018).
- 659 63. Gillis, S. & Roth, A. PyClone-VI: scalable inference of clonal population structures using  
660 whole genome data. *BMC Bioinformatics* **21**, 571 (2020).
- 661 64. Maciejowski, J. *et al.* APOBEC3-dependent kataegis and TREX1-driven chromothripsis  
662 during telomere crisis. *Nat. Genet.* **52**, 884–890 (2020).
- 663 65. Korbel, J. O. & Campbell, P. J. Criteria for Inference of Chromothripsis in Cancer Genomes.  
664 *Cell* **152**, 1226–1236 (2013).
- 665 66. Dobin, A. *et al.* STAR: ultrafast universal RNA-seq aligner. *Bioinformatics* **29**, 15–21 (2013).
- 666 67. Love, M. I., Huber, W. & Anders, S. Moderated estimation of fold change and dispersion for  
667 RNA-seq data with DESeq2. *Genome Biol.* **15**, 550 (2014).
- 668 68. Subramanian, A. *et al.* Gene set enrichment analysis: a knowledge-based approach for  
669 interpreting genome-wide expression profiles. *Proc. Natl. Acad. Sci. U. S. A.* **102**, 15545–  
670 15550 (2005).

- 671 69. Korotkevich, G., Sukhov, V. & Sergushichev, A. *Fast gene set enrichment analysis*. 060012  
672 <https://www.biorxiv.org/content/10.1101/060012v2> (2019) doi:10.1101/060012.
- 673 70. Liberzon, A. *et al.* Molecular signatures database (MSigDB) 3.0. *Bioinformatics* **27**, 1739–  
674 1740 (2011).
- 675
